# Supplementary material
Source: ML conference proceedings conference paper supplement (https://openaccess.thecvf.com/content/ACCV2024/html/Kim_BoT-FaceSORT_Bag-of-Tricks_for_ACCV_2024_paper.html)
Supplement: Supplementary file 1 [file Kim_BoT-FaceSORT_Bag-of-Tricks_for_ACCV_2024_supplemental.pdf]

# BoT-FaceSORT: Bag-of-Tricks for Robust Multi-Face Tracking in Unconstrained Videos (Supplementary Material)

Jonghyeon Kim<sup>1\*</sup>, Chan-Yang Ju<sup>1\*</sup>, Gun-Woo Kim<sup>2</sup>, and Dong-Ho Lee<sup>1†</sup>

<sup>1</sup> Department of Applied Artificial Intelligence, Hanyang University, South Korea  
{jonghyeon, karunogi, dhlee72}@hanyang.ac.kr

<sup>2</sup> Department of Computer Science and Engineering, Gyeongsang National University, South Korea  
gunwoo.kim@gnu.ac.kr

<https://github.com/bellhyeon/BoT-FaceSORT>

## A MovieShot Dataset

In this section, we provide the details of our proposed dataset for multi-face tracking, MovieShot. It consists of 10 movie clip videos from YouTube.

As shown in Table 1, MovieShot contains between 1,284 and 5,086 frames per clip, 9 to 58 unique tracks, 12 to 86 shot changes, and 1,979 to 14,247 face detections. The dataset consists of movies produced in the following five countries: India (IN), the United Kingdom (UK), the United States (US), South Korea (KR), and Hong Kong (HK). As illustrated in Figure 1, our dataset features faces from diverse ethnicities, including American, European, Indian, Korean, and Chinese. This diversity ensures that the dataset can be used to develop and evaluate unbiased tracking algorithms.

Table 1: Basic Statistics of the MovieShot dataset

| Video | Frames | Tracks | Shot changes | Face detections | Country |
|-------|--------|--------|--------------|-----------------|---------|
| # 1   | 4405   | 34     | 65           | 12997           | IN      |
| # 2   | 1284   | 10     | 26           | 1979            | UK      |
| # 3   | 3156   | 46     | 35           | 3426            | US      |
| # 4   | 2172   | 34     | 12           | 4847            | US      |
| # 5   | 2986   | 41     | 86           | 3549            | KR      |
| # 6   | 4340   | 58     | 85           | 9821            | UK      |
| # 7   | 3862   | 13     | 35           | 5877            | KR      |
| # 8   | 2558   | 37     | 36           | 4603            | HK      |
| # 9   | 5086   | 9      | 74           | 7858            | US      |
| # 10  | 2703   | 9      | 13           | 14247           | US      |

\* Major in Bio Artificial Intelligence

† Corresponding Author

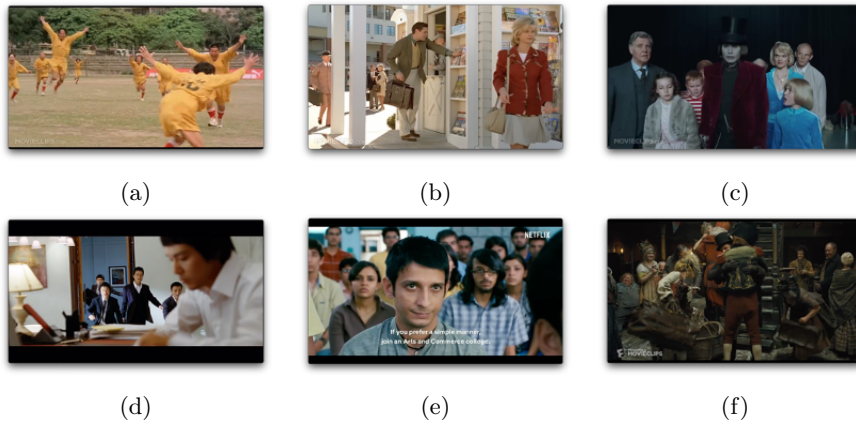

Fig. 1: Sample videos of the MovieShot dataset: (a) Shaolin Soccer, HK; (b) The Truman Show, US; (c) Charlie and the Chocolate Factory, UK; (d) The Scam, KR; (e) 3 Idiots, IN; (f) Les Misérables, UK.
